# Supplementary material
Source: PubMed Central journal article supplement (PMC6855402)
Supplement: NIHMS1058165-supplement-Supplemental_file.pdf [file NIHMS1058165-supplement-Supplemental_file.pdf]

## Supplemental Data

**Regulators of the protein phosphatase PP1 $\gamma$ 2, PPP1R2, PPP1R7, and PPP1R11, are involved in epididymal sperm maturation.**

Suranjana Goswami<sup>1</sup>, Luís Korrodi-Gregório<sup>2</sup>, Nilam Sinha<sup>1</sup>, Douglas Kline<sup>1</sup> and Srinivasan Vijayaraghavan<sup>1,\*</sup>

<sup>1</sup>*Department of Biological Sciences, Kent State University, Kent, Ohio 44242, USA*

<sup>2</sup>*Laboratory of Signal Transduction, Institute for Research in Biomedicine - iBiMED, Health Sciences Program, University of Aveiro, Campus de Santiago, 3810-193 Aveiro, Portugal.*

**\*Correspondence:** Srinivasan Vijayaraghavan, Department of Biological Sciences, Kent State University, Kent, OH 44242. E-mail: svijayar@kent.edu

## Supplemental Figure 1.

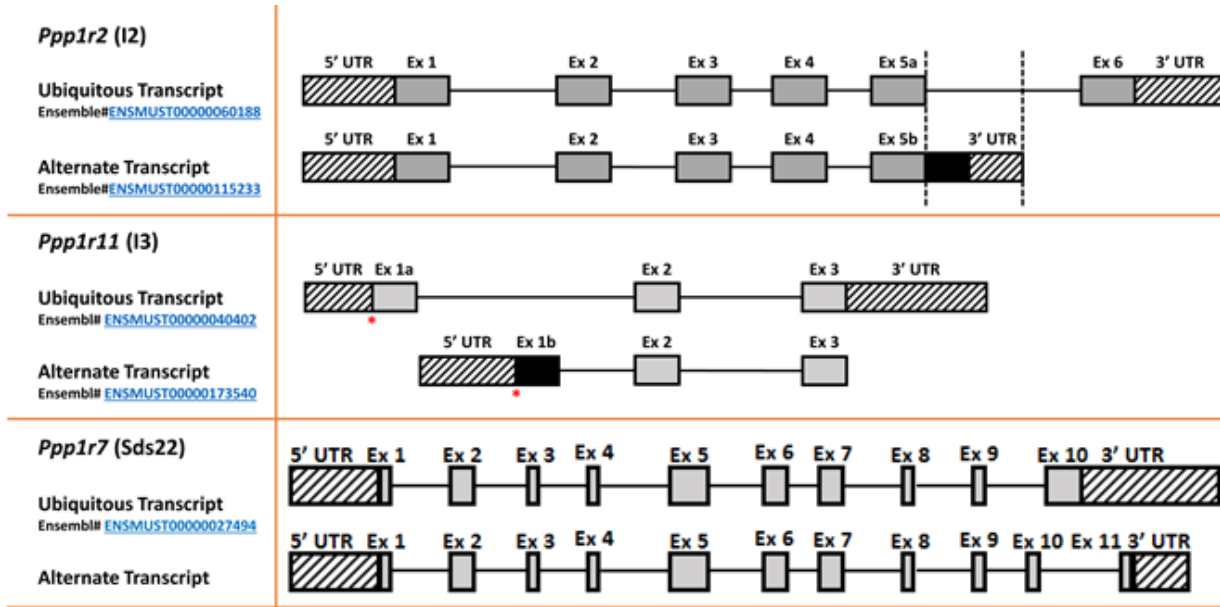

**Supplemental Figure S1. Schematic diagrams of the PP1 $\gamma$ 2 testis-enriched binding partners' pre-mRNAs.** The schematic diagrams show the arrangements of the exons and introns in the pre-mRNAs of PP1 $\gamma$ 2 binding partners in mice. PPP1R2 (I2): the predicted testis specific *Ppp1r2* transcript differs from the ubiquitous transcript by the retention of part of intron 5 region after splicing of exon 6. PPP1R11 (I3): on the contrary, the testis specific *Ppp1r11* transcript has a different N-terminus where the Exon 1b presence resulted due to an alternate start site (the asterisk mark show the difference in start site). PPP1R7 (sds22): the *Ppp1r7* testis specific isoform has an extra exon in the C-terminus (the exons and introns are not drawn to scale).

Supplemental Figure 2.

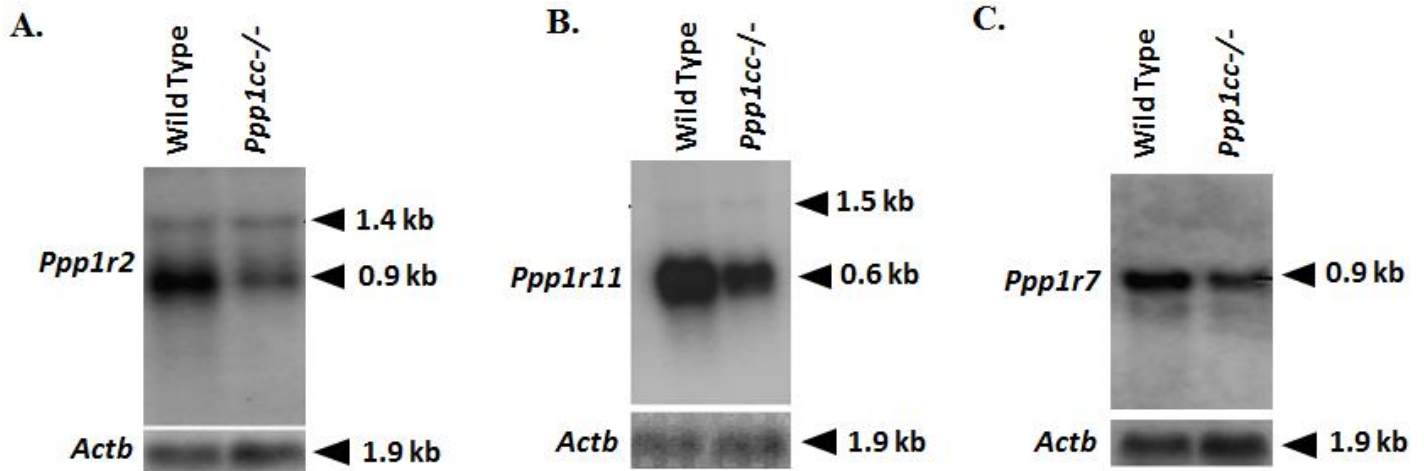

Supplemental Figure S2. mRNA abundance of PP1 $\gamma$ 2 testis-enriched binding partners in *Ppp1cc* knockout mice is reduced. (A, B, C and D) Northern blot analyses of total RNA (25  $\mu$ g) from mouse testis of wild type compared with *Ppp1cc* homozygous knockouts demonstrating the reduced expression of testis-specific isoform messages of *Ppp1r2* (A), *Ppp1r11* (B) and *Ppp1r7* (C). The lower panel represents the corresponding actin (loading control) blots

**Supplemental Figure 3.**

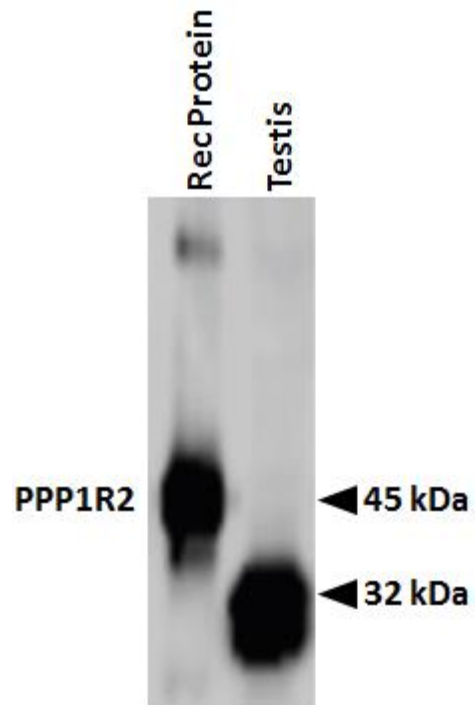

**Supplemental Figure S3. PPP1R2 antibody validation.** Validation of a new PPP1R2 antibody. PPP1R2 antibody was tested against recombinant His-protein (RecProtein) and in mice testis extract.

## Supplemental Figure 4

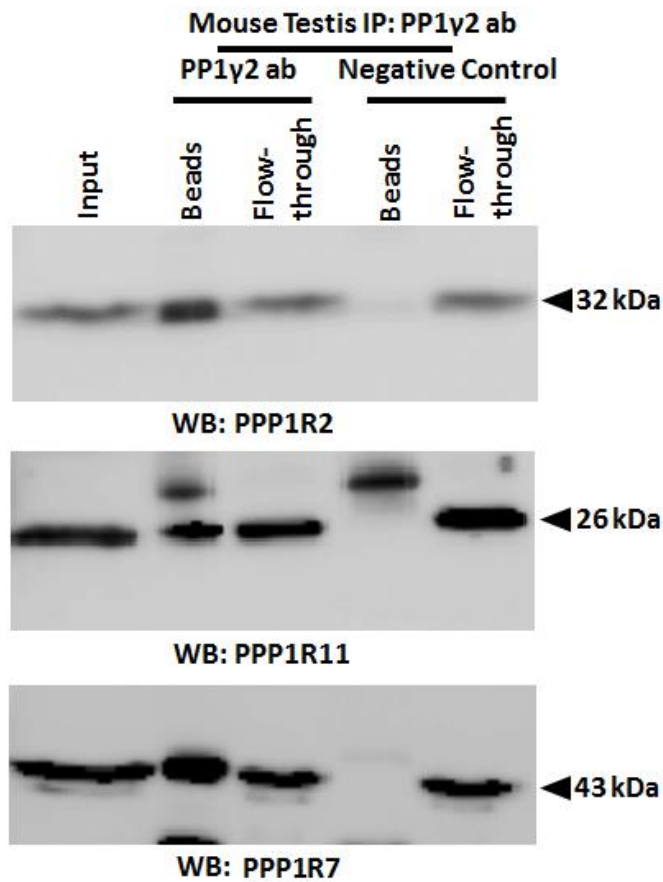

**Supplemental Figure S4. PP1 $\gamma$ 2 binds with PPP1R2, PPP1R11 and PPP1R7 in testis.** Mouse testis co-immunoprecipitations were done with PP1 $\gamma$ 2 antibody. The input, beads and flow-through extracts were probed with PPP1R2 (32 kDa), PPP1R11 (26 kDa) and PPP1R7 (43 kDa) antibodies. All the three regulators in testis show up in bead fraction. In the negative control mostly they were observed in the flow-through fraction.

## Supplemental Figure S5

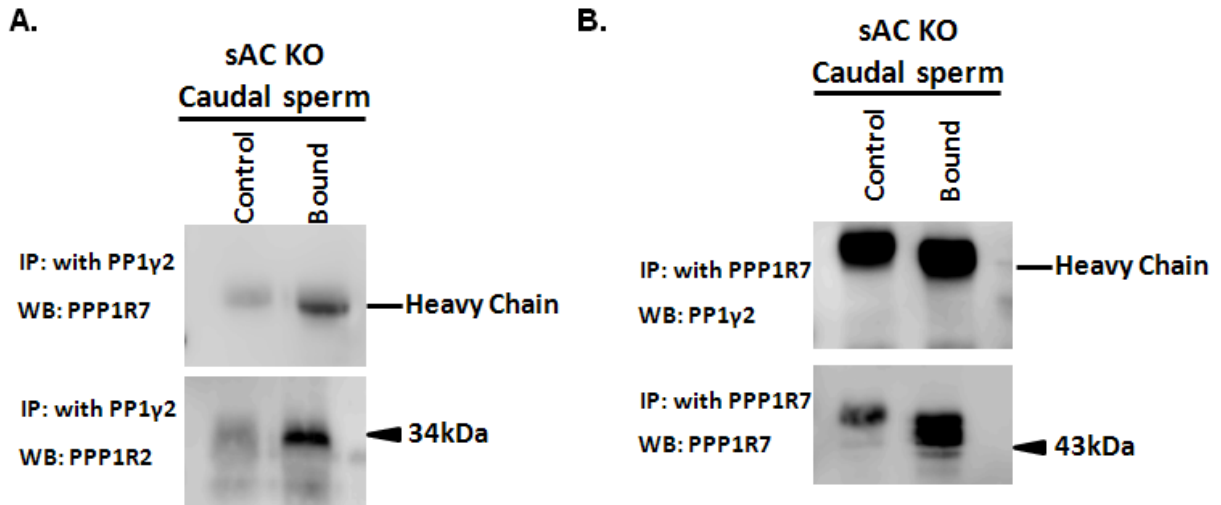

**Supplemental Figure S5. Binding of PPP1R7 is different with PP1 $\gamma$ 2 in sAC KO caudal sperm extracts.** (A) Immunoprecipitation was done with PP1 $\gamma$ 2 antibody using caudal sperm extracts. Immunoblots probed with PPP1R7 and PPP1R2 show that PPP1R7 is not bound to PP1 $\gamma$ 2 whereas PPP1R2 is bound to PP1 $\gamma$ 2. (B) Reciprocal IP was done in caudal sperm extracts using PPP1R7 and the immunoblots were probed with PP1 $\gamma$ 2 to confirm that it is not bound to PPP1R7. The same blot was reprobed with PPP1R7 antibody as a control to show that the immunoprecipitation worked.

**Supplemental Figure S6**

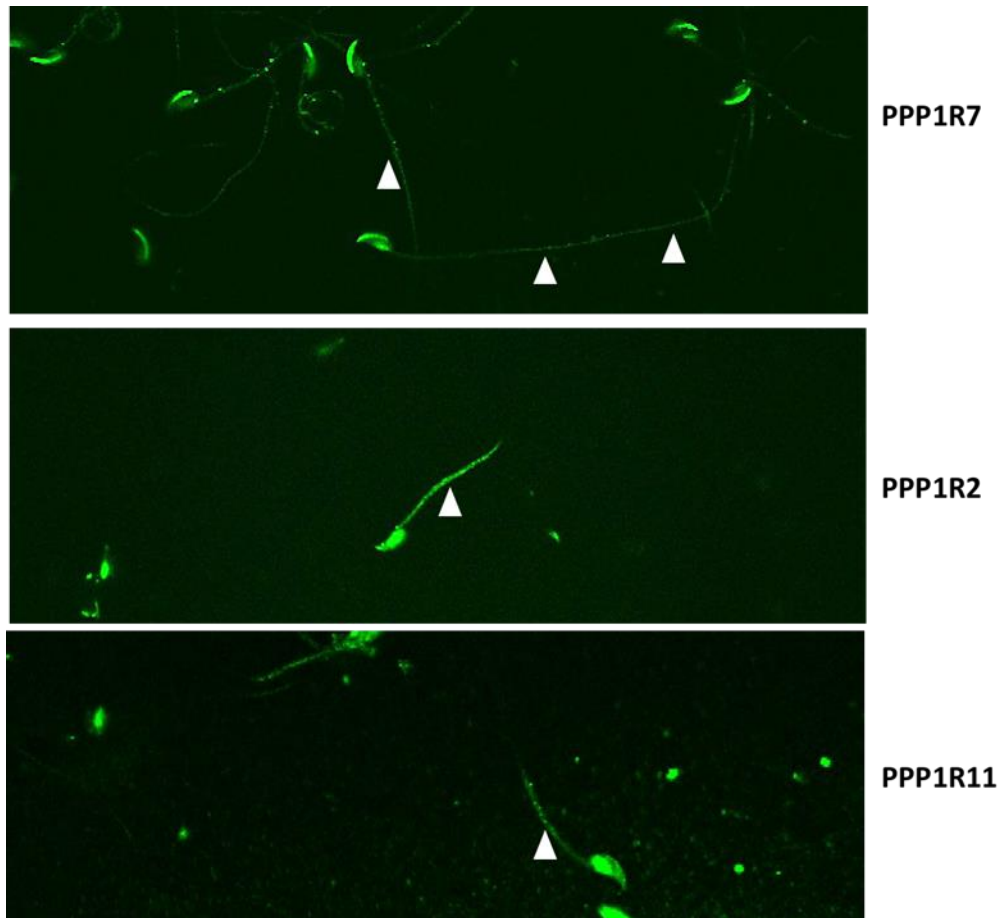

**Supplemental Figure S6:** PPP1R2, PPP1R7 and PPP1R11 staining in mouse spermatozoa.

(A) rabbit anti-PPP1R7 (B) rabbit anti-PPP1R2 (C) rabbit anti-PPP1R11 (D) antibodies. Specific secondary antibodies conjugated with Alexa Fluor 488 were used. PPP1R2, PPP1R11 and PPP1R7 are localized in mouse spermatozoa flagellum just like PP1 $\gamma$ 2.
